# Supplementary material for: The Effects of Two-Stage Fermented Feather Meal-Soybean Meal Product on Growth Performance, Blood Biochemistry, and Immunity of Nursery Pigs
Source: MDPI journal article supplement (doi:10.3390/fermentation8110634), 2022-11-12
Supplement: s1 [file s1]

Archive with 1 entries (1 files):
- fermentation-1985390-supplementary.pdf
